# Supplementary material
Source: PubMed Central journal article supplement (PMC2676009)

## Supplemental Figure Legends

**Fig. S1. Effects of dexamethasone on MMTV- and GnRH promoter-Luc reporters activities in GT1-1 cells.** GT1-1 cells were transiently transfected with 100 ng of the GC-responsive pMMTV-Luc (A) or the pGnRH-Luc (B) reporter plasmid and treated with VEH (0.1% ethanol) or various doses of DEX as indicated for 24 h. The data are shown as means  $\pm$  SE (n=6). \*\*: p<0.01 vs. vehicle treated cells.

**Fig. S2. Expression of exon 2-skipped form of GnRH transcript in GT1-1 cells.** GT1-1 cells were treated with VEH or  $10^{-6}$  M DEX for 24 h. Total RNA was isolated and RT-PCR performed to measure rate of exon 2 skipping using E1-up and E3-dn primers. Bars are means of 13 to 123 ratios  $\pm$  SE (n=3).

**Fig. S3. Effects of dexamethasone on Tra2 $\alpha$ , 9G8 and SRp30c mRNA levels.** (A) GT1-1 cells were treated with VEH or  $10^{-6}$  M DEX for 24 h. Northern blot hybridizations were performed using  $^{32}$ P-labeled cDNA probes complementary to indicated SR and SR-like protein genes. GAPDH was used as an internal control ensuring the equal amounts of loaded RNAs. (B-E) Quantitative real-time RT-PCR performed to measure mRNA levels of indicated genes. Values were normalized to GAPDH mRNA level. Bars are means  $\pm$  SE (n=3). \*\*: p<0.01 vs. vehicle treated cells.

**Fig. S4. Effect of antisense-Nova-1 (AS-Nova-1) on Flag-tagged Nova-1 expression.** Different amount of AS-Nova-1 (0, 0.2, 0.5 or 1  $\mu$ g) were cotransfected with 0.1  $\mu$ g of Flag-Nova-1 expression vector into NIH3T3 cells. After 48 h, cells were harvested and Western blotting was performed with anti-Flag and anti- $\beta$ -Actin antibodies.

## References for Supplemental Table

1. Ladd, A. N., Charlet, N., and Cooper, T. A. (2001) *Mol Cell Biol.* **21**, 1285-1296.
2. Duncan, P. I., Stojdl, D. F., Marius, R. M., Scheit, K. H., and Bell, J. C. (1998) *Exp Cell Res.* **241**, 300-308.
3. Lisbin, M. J., Qiu, J., and White, K. (2001) *Genes Dev.* **15**, 2546-2561.
4. Jin, Y., Suzuki, H., Maegawa, S., Endo, H., Sugano, S., Hashimoto, K., Yasuda, K., and Inoue, K. (2003) *EMBO J.* **22**, 905-912.
5. Wakamatsu, Y., and Weston, J. A. (1997) *Development.* **124**, 3449-3460.
6. Min, H., Turck, C.W., Nikolic, J. M., and Black, D. L. (1997) *Genes Dev.* **11**, 1023-1036.
7. Zhang, W., Liu, H., Han, K., and Grabowski, P. J. (2002) *RNA.* **8**, 671-685.

8. Murata, J., Murayama, A., Horii, A., Doi, K., Harada, T., Okano, H., and Kubo, T. (2004) *Neurosci Lett.* **354**, 201-204.
9. Jensen, K. B., Dredge, B. K., Stefani, G., Zhong, R., Buckanovich, R. J., Okano, H. J., Yang, Y. Y., and Darnell, R. B. (2000) *Neuron.* **25**, 359-371.
10. Zachar, Z., Chou, T. B., Kramer, J., Mims, I. P., Bingham, P. M. (1994) *Genetics.* **137**, 139-150.
11. Wang, H. Y., Arden, K. C., Bermingham, J. R. Jr., Viars, C. S., Lin, W., Boyer, A. D., and Fu, X. D. (1999) *Genomics.* **57**, 310-315.

# Supplemental Table S1

## Primer sequences for RT-PCR and gene cloning

| Name    | Primer sequence                                                   | Gene bank # | References                    |
|---------|-------------------------------------------------------------------|-------------|-------------------------------|
| CELF6   | up: 5'-TTGGTGATGCGGAAC TCATA-3'<br>dn: 5'-GACCTTGAGCCTCTTCATGC-3' | BC052406    | (Ladd <i>et al.</i> , 2001)   |
| CLK     | up: 5'-AGAAAACCAGGAAACGCAGA-3'<br>dn: 5'-TTTTCCCAACGAGGTCAAAG-3'  | NM_009905   | (Duncan <i>et al.</i> , 1998) |
| CUG-BP  | up: 5'-CATCCCCAATGGTGGTAAAG-3'<br>dn: 5'-GTGTTGAGGTTCCACAGGA-3'   | NM_017368   | (Ladd <i>et al.</i> , 2001)   |
| ELAV    | up: 5'-AGCAATCAGCACACTGAACG-3'<br>dn: 5'-CCTCTGGACAAACCTGTGGT-3'  | BC016194    | (Lisbin <i>et al.</i> , 2001) |
| ETR-3   | up: 5'-TGAACTTACCCCGCAGTACC-3'<br>dn: 5'-GACAGAGGGTTTGCATTGGT-3'  | BC026856    | (Ladd <i>et al.</i> , 2001)   |
| Fox-1   | up: 5'-CCAGACCTCCGACAAATGTT-3'<br>dn: 5'-CCATTGGTGTAGGGGTTGAC-3'  | AB041596    | (Jin <i>et al.</i> , 2003)    |
| HuB     | up: 5'-GGAGCATTGGCGAGATAGAG-3'<br>dn: 5'-CCTCAATCCGCTTGTCAAAT-3'  | AY035397    | (Wakamatsu and Weston, 1997)  |
| HuC     | up: 5'-GTCCTATGCACGTCCCAGTT-3'<br>dn: 5'-ACTGGTACAGGTGGGTGAGC-3'  | BC052097    | (Wakamatsu and Weston, 1997)  |
| KSRP    | up: 5'-GGACTCAGGCTGCAAAGTTC-3'<br>dn: 5'-CTGGGAGCCATCCTGAATTA-3'  | NM_010613   | (Min <i>et al.</i> , 1997)    |
| NAPOR-1 | up: 5'-CTTGCCCCTGGTTACACCTA-3'<br>dn: 5'-GTGGTACCCATTGGTGAAGG-3'  | D49654      | (Zhang <i>et al.</i> , 2002)  |
| Msi-1   | up: 5'-CAAACGCTGTGGAAGACAGA-3'<br>dn: 5'-GCAGTGTGAGCTGTTGCAT-3'   | AF090696    | (Murata <i>et al.</i> , 2004) |
| Nova-1  | up: 5'-ACAGGTCCAGTGGCAAATTC-3'<br>dn: 5'-AGCCAGGCTACCTAATGCAA-3'  | XM_356586   | (Jensen <i>et al.</i> , 2000) |
| SWAP    | up: 5'-CTGTGGCCGAGGTAGAGAAG-3'<br>dn: 5'-GCTTCTCCCGAACTCTCTT-3'   | NM_016680   | (Zachar <i>et al.</i> , 1994) |
| SRPK1   | up: 5'-CATTCGGGCAGATACACCTT-3'<br>dn: 5'-CAGGGGTGTGTAGCCAGAT-3'   | BC050761    | (Wang <i>et al.</i> , 1999)   |
| SRPK2   | up: 5'-TTTCTGGGCCCTTAGAACCT-3'<br>dn: 5'-AGGGTTCACCAACAGGTCAG-3'  | BC062941    | (Wang <i>et al.</i> , 1999)   |

up: upstream  
dn: downstream

# Supplemental Figure S1

**A**

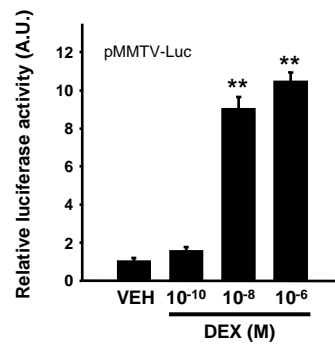

**B**

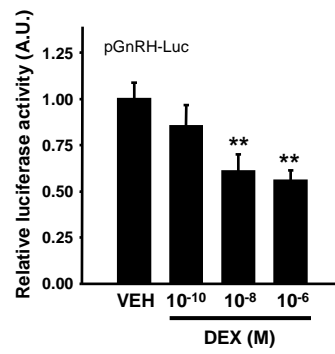

# Supplemental Figure S2

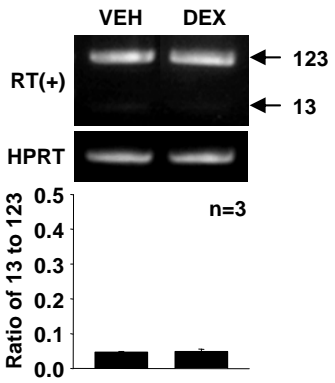

# Supplemental Figure S3

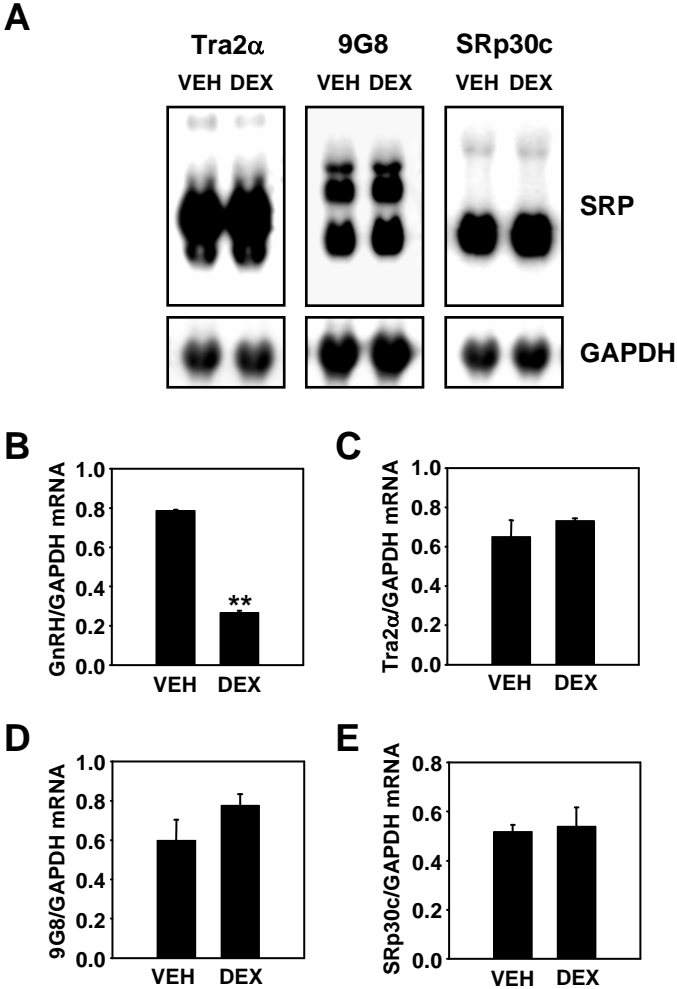

# Supplemental Figure S4

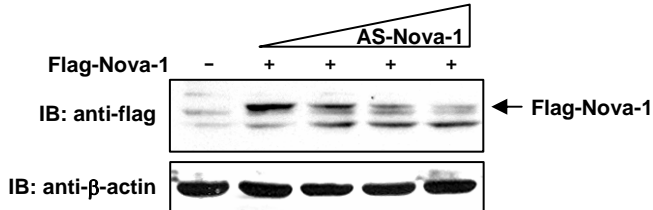

Supplement: M807386200_1.pdf [file M807386200_1.pdf]
